# Supplementary material for: How does theory compare to experiment for oscillator strengths in electronic spectra? Proposing range-separated hybrids with reliable accountability
Source: Royal Society of Chemistry journal article supplement (doi:10.1039/d3cp04793h), 2023-12-13
Supplement: d3cp04793h1.pdf [file d3cp04793h1.pdf]

Supporting Information for the paper entitled:

**How Does Theory Compare to Experiment for Oscillator Strengths in Electronic Spectra?  
Proposing Range-Separated Hybrids with Reliable Accountability**

Mahdi Soltani Nejad and Mojtaba Alipour\*

*Department of Chemistry, School of Science, Shiraz University, Shiraz 71946-84795, Iran*

**AUTHOR INFORMATION**

**\* Corresponding Author.**

**E-mail:** malipour@shirazu.ac.ir.

**Fax:** +98 71 36460788.

**Phone:** +98 71 36137160.

---

*This file includes 16 tables (Tables S1-S16) and 1 figure (Figure S1).*

**Table S1.** The computed oscillator strengths using the proposed approximations within the framework of OT-RSHs-PCM based on different DFAs, BLYP, PBE, and TPSS, for all the molecules with the “very high” confidence level on their experimental oscillator strengths.

| Molecule    | $\alpha = 0.0,$<br>$\beta = 1.0$ |       |       | $\alpha = 0.05,$<br>$\beta = 0.95$ |       |       |
|-------------|----------------------------------|-------|-------|------------------------------------|-------|-------|
|             | BLYP                             | PBE   | TPSS  | BLYP                               | PBE   | TPSS  |
| <b>I</b>    | 1.026                            | 0.985 | 1.011 | 1.040                              | 0.997 | 1.022 |
| <b>II</b>   | 0.480                            | 0.484 | 0.497 | 0.490                              | 0.494 | 0.506 |
| <b>III</b>  | 0.269                            | 0.271 | 0.276 | 0.277                              | 0.280 | 0.284 |
| <b>IV</b>   | 0.071                            | 0.072 | 0.075 | 0.078                              | 0.079 | 0.082 |
| <b>V</b>    | 0.054                            | 0.056 | 0.059 | 0.060                              | 0.062 | 0.065 |
| <b>VI</b>   | 0.083                            | 0.084 | 0.089 | 0.091                              | 0.092 | 0.097 |
| <b>VII</b>  | 0.392                            | 0.397 | 0.411 | 0.409                              | 0.415 | 0.426 |
| <b>VIII</b> | 0.437                            | 0.439 | 0.453 | 0.458                              | 0.459 | 0.473 |
| <b>IX</b>   | 0.777                            | 0.781 | 0.805 | 0.803                              | 0.807 | 0.829 |
| <b>X</b>    | 0.737                            | 0.742 | 0.763 | 0.759                              | 0.764 | 0.785 |
| <b>XI</b>   | 0.264                            | 0.267 | 0.283 | 0.279                              | 0.282 | 0.296 |
| <b>XII</b>  | 0.102                            | 0.100 | 0.106 | 0.108                              | 0.106 | 0.111 |
| <b>XIII</b> | 0.075                            | 0.073 | 0.077 | 0.080                              | 0.078 | 0.082 |
| <b>XIV</b>  | 0.118                            | 0.115 | 0.119 | 0.124                              | 0.122 | 0.125 |

| Molecule    | $\alpha = 0.10,$<br>$\beta = 0.90$ |       |       | $\alpha = 0.15,$<br>$\beta = 0.85$ |       |       |
|-------------|------------------------------------|-------|-------|------------------------------------|-------|-------|
|             | BLYP                               | PBE   | TPSS  | BLYP                               | PBE   | TPSS  |
| <b>I</b>    | 1.054                              | 1.009 | 1.032 | 1.014                              | 1.020 | 1.042 |
| <b>II</b>   | 0.496                              | 0.504 | 0.516 | 0.507                              | 0.514 | 0.526 |
| <b>III</b>  | 0.284                              | 0.287 | 0.290 | 0.287                              | 0.290 | 0.293 |
| <b>IV</b>   | 0.086                              | 0.087 | 0.090 | 0.093                              | 0.094 | 0.097 |
| <b>V</b>    | 0.066                              | 0.068 | 0.072 | 0.073                              | 0.075 | 0.079 |
| <b>VI</b>   | 0.099                              | 0.100 | 0.105 | 0.107                              | 0.108 | 0.113 |
| <b>VII</b>  | 0.424                              | 0.430 | 0.440 | 0.436                              | 0.443 | 0.451 |
| <b>VIII</b> | 0.478                              | 0.480 | 0.493 | 0.498                              | 0.499 | 0.512 |
| <b>IX</b>   | 0.828                              | 0.834 | 0.852 | 0.847                              | 0.852 | 0.870 |
| <b>X</b>    | 0.780                              | 0.786 | 0.805 | 0.800                              | 0.806 | 0.823 |
| <b>XI</b>   | 0.291                              | 0.294 | 0.306 | 0.302                              | 0.305 | 0.316 |
| <b>XII</b>  | 0.114                              | 0.111 | 0.116 | 0.119                              | 0.117 | 0.121 |
| <b>XIII</b> | 0.085                              | 0.083 | 0.087 | 0.090                              | 0.087 | 0.088 |
| <b>XIV</b>  | 0.130                              | 0.128 | 0.131 | 0.136                              | 0.134 | 0.137 |

**Table S2.** The excitation energies, oscillator strengths,  $D$  and  $M_{AC}$  indexes, as well as the character of the excited states computed using the PBE-based OT-RSH-PCM ( $\alpha = 0.0, \beta = 1.0$ ). The values of  $\Delta r$  index ( $\text{\AA}$ ) are also shown in parenthesis (see the main text).

| Molecule    | $E$ (eV) | $f$   | $D$ ( $\text{\AA}$ ) | $M_{AC}$ (eV) | Character |
|-------------|----------|-------|----------------------|---------------|-----------|
| <b>I</b>    | 4.40     | 0.985 | 0.38                 | -33.33        | L         |
| <b>II</b>   | 4.15     | 0.379 | 0.68                 | -14.40        | L         |
| <b>III</b>  | 4.42     | 0.255 | 2.23                 | 0.72          | CT (real) |
| <b>IV</b>   | 3.50     | 0.072 | 1.59                 | -4.63         | L         |
| <b>V</b>    | 3.47     | 0.055 | 1.57                 | -4.75         | L         |
| <b>VI</b>   | 3.24     | 0.084 | 1.29                 | -7.12         | L         |
| <b>VII</b>  | 4.22     | 0.381 | 2.40 (1.67)          | -1.05         | L         |
| <b>VIII</b> | 3.14     | 0.433 | 3.17 (2.51)          | -0.77         | CT (real) |
| <b>IX</b>   | 3.89     | 0.758 | 2.08 (1.26)          | -2.56         | L         |
| <b>X</b>    | 3.86     | 0.647 | 2.25 (1.57)          | -1.86         | L         |
| <b>XI</b>   | 4.01     | 0.266 | 0.62                 | -18.81        | L         |
| <b>XII</b>  | 5.39     | 0.099 | 0.16                 | -84.18        | L         |
| <b>XIII</b> | 4.72     | 0.070 | 0.98                 | -7.01         | L         |
| <b>XIV</b>  | 4.62     | 0.115 | 0.74                 | -11.91        | L         |

**Table S3.** The excitation energies, oscillator strengths,  $D$  and  $M_{AC}$  indexes, as well as the character of the excited states computed using the PBE-based OT-RSH-PCM ( $\alpha = 0.05, \beta = 0.95$ ). The values of  $\Delta r$  index ( $\text{\AA}$ ) are also shown in parenthesis (see the main text).

| Molecule    | $E$ (eV) | $f$   | $D(\text{\AA})$ | $M_{AC}(\text{eV})$ | Character |
|-------------|----------|-------|-----------------|---------------------|-----------|
| <b>I</b>    | 4.44     | 0.997 | 0.38            | -33.55              | L         |
| <b>II</b>   | 4.18     | 0.412 | 0.69            | -14.21              | L         |
| <b>III</b>  | 4.48     | 0.262 | 2.18            | 0.66                | CT (real) |
| <b>IV</b>   | 3.61     | 0.079 | 1.52            | -4.90               | L         |
| <b>V</b>    | 3.57     | 0.061 | 1.51            | -5.00               | L         |
| <b>VI</b>   | 3.33     | 0.092 | 1.25            | -7.45               | L         |
| <b>VII</b>  | 4.31     | 0.403 | 2.25 (1.65)     | -1.44               | L         |
| <b>VIII</b> | 3.21     | 0.454 | 3.08 (2.53)     | -0.93               | CT (real) |
| <b>IX</b>   | 3.96     | 0.757 | 1.94 (1.35)     | -3.06               | L         |
| <b>X</b>    | 3.90     | 0.407 | 2.53 (1.93)     | -1.18               | L         |
| <b>XI</b>   | 4.06     | 0.281 | 0.53            | -22.78              | L         |
| <b>XII</b>  | 5.42     | 0.105 | 0.15            | -89.43              | L         |
| <b>XIII</b> | 4.79     | 0.075 | 0.91            | -8.09               | L         |
| <b>XIV</b>  | 4.69     | 0.122 | 0.67            | -13.87              | L         |

**Table S4.** The excitation energies, oscillator strengths,  $D$  and  $M_{AC}$  indexes, as well as the character of the excited states computed using the PBE-based OT-RSH-PCM ( $\alpha = 0.10, \beta = 0.90$ ). The values of  $\Delta r$  index ( $\text{\AA}$ ) are also shown in parenthesis (see the main text).

| Molecule    | $E$ (eV) | $f$   | $D(\text{\AA})$ | $M_{AC}(\text{eV})$ | Character |
|-------------|----------|-------|-----------------|---------------------|-----------|
| <b>I</b>    | 4.48     | 1.009 | 0.38            | -33.58              | L         |
| <b>II</b>   | 4.22     | 0.437 | 0.69            | -14.26              | L         |
| <b>III</b>  | 4.53     | 0.267 | 2.15            | 0.58                | CT (real) |
| <b>IV</b>   | 3.71     | 0.086 | 1.46            | -5.30               | L         |
| <b>V</b>    | 3.68     | 0.068 | 1.45            | -5.37               | L         |
| <b>VI</b>   | 3.42     | 0.100 | 1.19            | -7.97               | L         |
| <b>VII</b>  | 4.41     | 0.422 | 2.11 (1.63)     | -1.86               | L         |
| <b>VIII</b> | 3.28     | 0.474 | 2.98 (2.53)     | -1.13               | CT (real) |
| <b>IX</b>   | 4.04     | 0.539 | 2.09 (1.94)     | -1.76               | L         |
| <b>X</b>    | 3.98     | 0.691 | 1.99 (1.37)     | -2.84               | L         |
| <b>XI</b>   | 4.11     | 0.293 | 0.48            | -25.69              | L         |
| <b>XII</b>  | 5.45     | 0.110 | 0.15            | -92.64              | L         |
| <b>XIII</b> | 4.86     | 0.080 | 0.84            | -9.36               | L         |
| <b>XIV</b>  | 4.76     | 0.128 | 0.63            | -15.45              | L         |

**Table S5.** The excitation energies, oscillator strengths,  $D$  and  $M_{AC}$  indexes, as well as the character of the excited states computed using the PBE-based OT-RSH-PCM ( $\alpha = 0.15, \beta = 0.85$ ). The values of  $\Delta r$  index ( $\text{\AA}$ ) are also shown in parenthesis (see the main text).

| Molecule    | $E$ (eV) | $f$   | $D(\text{\AA})$ | $M_{AC}(\text{eV})$ | Character |
|-------------|----------|-------|-----------------|---------------------|-----------|
| <b>I</b>    | 4.52     | 1.020 | 0.38            | -33.10              | L         |
| <b>II</b>   | 4.25     | 0.458 | 0.69            | -14.22              | L         |
| <b>III</b>  | 4.55     | 0.270 | 2.15            | 0.31                | CT (real) |
| <b>IV</b>   | 3.82     | 0.094 | 1.39            | -5.76               | L         |
| <b>V</b>    | 3.78     | 0.075 | 1.38            | -5.88               | L         |
| <b>VI</b>   | 3.50     | 0.108 | 1.13            | -8.61               | L         |
| <b>VII</b>  | 4.49     | 0.438 | 1.96 (1.60)     | -2.36               | L         |
| <b>VIII</b> | 3.36     | 0.495 | 2.85 (2.55)     | -1.38               | CT (real) |
| <b>IX</b>   | 4.07     | 0.706 | 1.79 (1.37)     | -3.06               | L         |
| <b>X</b>    | 4.06     | 0.761 | 1.76 (1.28)     | -3.20               | L         |
| <b>XI</b>   | 4.15     | 0.304 | 0.43            | -29.34              | L         |
| <b>XII</b>  | 5.47     | 0.116 | 0.13            | -103.34             | L         |
| <b>XIII</b> | 4.93     | 0.084 | 0.79            | -10.71              | L         |
| <b>XIV</b>  | 4.84     | 0.134 | 0.58            | -17.25              | L         |

**Table S6.** The computed oscillator strengths using the PBE-based OT-RSH-PCM ( $\alpha = 0.0, \beta = 1.0$ ) with different basis sets for all the molecules with the “very high” confidence level on their experimental oscillator strengths. Also given as the boldface in the last rows are the corresponding statistical metrics.

| Molecule    | 6-31+G(d)    | 6-311++G(d,p) | 6-311++G(2df,2p) | TZVP         |
|-------------|--------------|---------------|------------------|--------------|
| <b>I</b>    | 0.985        | 1.020         | 1.018            | 0.980        |
| <b>II</b>   | 0.484        | 0.476         | 0.470            | 0.475        |
| <b>III</b>  | 0.271        | 0.269         | 0.269            | 0.262        |
| <b>IV</b>   | 0.072        | 0.072         | 0.070            | 0.073        |
| <b>V</b>    | 0.056        | 0.055         | 0.053            | 0.056        |
| <b>VI</b>   | 0.084        | 0.083         | 0.080            | 0.083        |
| <b>VII</b>  | 0.397        | 0.389         | 0.381            | 0.382        |
| <b>VIII</b> | 0.439        | 0.434         | 0.432            | 0.447        |
| <b>IX</b>   | 0.781        | 0.775         | 0.774            | 0.798        |
| <b>X</b>    | 0.742        | 0.736         | 0.737            | 0.759        |
| <b>XI</b>   | 0.267        | 0.263         | 0.258            | 0.260        |
| <b>XII</b>  | 0.100        | 0.102         | 0.100            | 0.105        |
| <b>XIII</b> | 0.073        | 0.072         | 0.072            | 0.077        |
| <b>XIV</b>  | 0.115        | 0.116         | 0.119            | 0.123        |
| <b>MSD</b>  | <b>0.071</b> | <b>0.070</b>  | <b>0.068</b>     | <b>0.071</b> |
| <b>MAD</b>  | <b>0.073</b> | <b>0.073</b>  | <b>0.072</b>     | <b>0.074</b> |
| <b>RMSD</b> | <b>0.106</b> | <b>0.109</b>  | <b>0.108</b>     | <b>0.108</b> |

**Table S7.** The computed oscillator strengths using the PBE-based OT-RSH-PCM ( $\alpha = 0.0, \beta = 1.0$ ) with different geometries optimized at different basis sets for all the molecules with the “very high” confidence level on their experimental oscillator strengths. Also given as the boldface in the last rows are the corresponding statistical metrics.

| Molecule    | 6-31+G(d)    | 6-311++G(d,p) | 6-311++G(2df,2p) | TZVP         |
|-------------|--------------|---------------|------------------|--------------|
| <b>I</b>    | 0.985        | 0.988         | 0.990            | 0.989        |
| <b>II</b>   | 0.484        | 0.490         | 0.493            | 0.494        |
| <b>III</b>  | 0.271        | 0.265         | 0.267            | 0.264        |
| <b>IV</b>   | 0.072        | 0.074         | 0.075            | 0.074        |
| <b>V</b>    | 0.056        | 0.056         | 0.057            | 0.057        |
| <b>VI</b>   | 0.084        | 0.085         | 0.085            | 0.085        |
| <b>VII</b>  | 0.397        | 0.395         | 0.396            | 0.396        |
| <b>VIII</b> | 0.439        | 0.429         | 0.432            | 0.427        |
| <b>IX</b>   | 0.781        | 0.777         | 0.780            | 0.778        |
| <b>X</b>    | 0.742        | 0.738         | 0.740            | 0.738        |
| <b>XI</b>   | 0.267        | 0.286         | 0.272            | 0.287        |
| <b>XII</b>  | 0.100        | 0.101         | 0.101            | 0.101        |
| <b>XIII</b> | 0.073        | 0.073         | 0.073            | 0.073        |
| <b>XIV</b>  | 0.115        | 0.116         | 0.117            | 0.116        |
| <b>MSD</b>  | <b>0.071</b> | <b>0.071</b>  | <b>0.071</b>     | <b>0.071</b> |
| <b>MAD</b>  | <b>0.073</b> | <b>0.074</b>  | <b>0.074</b>     | <b>0.074</b> |
| <b>RMSD</b> | <b>0.106</b> | <b>0.106</b>  | <b>0.107</b>     | <b>0.107</b> |



**Table S8.** Assessment of the integration grid dependence of the best proposed approximation in the calculations of the oscillator strengths for all the molecules with the “very high” confidence level on their experimental oscillator strengths.

| Molecule    | <i>FineGrid</i> | <i>UltraFineGrid</i> | <i>SuperFineGrid</i> |
|-------------|-----------------|----------------------|----------------------|
| <b>I</b>    | 0.9851          | 0.9851               | 0.9851               |
| <b>II</b>   | 0.4843          | 0.4843               | 0.4843               |
| <b>III</b>  | 0.2714          | 0.2713               | 0.2713               |
| <b>IV</b>   | 0.0723          | 0.0723               | 0.0723               |
| <b>V</b>    | 0.0555          | 0.0555               | 0.0555               |
| <b>VI</b>   | 0.0839          | 0.0839               | 0.0839               |
| <b>VII</b>  | 0.3970          | 0.3970               | 0.3970               |
| <b>VIII</b> | 0.4387          | 0.4387               | 0.4387               |
| <b>IX</b>   | 0.7812          | 0.7812               | 0.7812               |
| <b>X</b>    | 0.7417          | 0.7418               | 0.7418               |
| <b>XI</b>   | 0.2668          | 0.2668               | 0.2668               |
| <b>XII</b>  | 0.0999          | 0.0999               | 0.0999               |
| <b>XIII</b> | 0.0729          | 0.0729               | 0.0729               |
| <b>XIV</b>  | 0.1153          | 0.1153               | 0.1153               |
| <b>MSD</b>  | <b>0.071</b>    | <b>0.071</b>         | <b>0.071</b>         |
| <b>MAD</b>  | <b>0.073</b>    | <b>0.073</b>         | <b>0.073</b>         |
| <b>RMSD</b> | <b>0.106</b>    | <b>0.106</b>         | <b>0.106</b>         |

**Table S9.** Optimally tuned values of the range-separation parameter (Bohr<sup>-1</sup>) for the molecules with the “high” confidence level on their experimental oscillator strengths using the combination  $\alpha = 0.0, \beta = 1.0$ .

| Molecule     | $\mu$  |
|--------------|--------|
| <b>XV</b>    | 0.1294 |
| <b>XVI</b>   | 0.0294 |
| <b>XVII</b>  | 0.0443 |
| <b>XVIII</b> | 0.0355 |
| <b>XIX</b>   | 0.0440 |
| <b>XX</b>    | 0.0471 |
| <b>XXI</b>   | 0.0423 |
| <b>XXII</b>  | 0.0993 |
| <b>XXIII</b> | 0.0320 |

**Table S10.** The computed values of the oscillator strengths for the molecules with the “high” confidence level on their experimental oscillator strengths using the best proposed approximation.

| Molecule     | Band | $f$   |
|--------------|------|-------|
| <b>XV</b>    | 1    | 0.026 |
| <b>XVI</b>   | 1    | 0.602 |
| <b>XVII</b>  | 1    | 0.326 |
| <b>XVIII</b> | 1    | 0.506 |
| <b>XIX</b>   | 2    | 0.258 |
| <b>XX</b>    | 2    | 0.279 |
| <b>XXI</b>   | 1    | 0.089 |
|              | 2    | 0.228 |
| <b>XXII</b>  | 1    | 0.443 |
| <b>XXIII</b> | 1    | 0.101 |

**Table S11.** The excitation energies, oscillator strengths,  $D$  and  $M_{AC}$  indexes, as well as the character of the excited states computed using the PBE-based OT-RSH ( $\alpha = 0.0, \beta = 1.0$ ). For those cases where  $D$  is equal to zero, the values of the integral revealing the degree of hole and electron overlap are also shown in parenthesis (see the main text). Also given in the table are the values of the range-separation parameter  $\mu$  (Bohr<sup>-1</sup>) and the CC2 oscillator strengths ( $f^{CC2}$ ) used as reference.

| Molecule  | $\mu$ | $f^{CC2}$ | $f$   | $E$ (eV) | $D$ (Å)     | $M_{AC}$ (eV) | Character |
|-----------|-------|-----------|-------|----------|-------------|---------------|-----------|
| <b>A</b>  | 0.234 | 0.547     | 0.482 | 5.29     | 0.00 (0.86) | -75500.46     | L         |
| <b>B</b>  | 0.238 | 0.499     | 0.480 | 3.08     | 0.32        | -38.85        | L         |
| <b>C</b>  | 0.251 | 0.337     | 0.334 | 4.33     | 0.83        | -8.88         | L         |
| <b>D</b>  | 0.218 | 0.891     | 0.948 | 3.97     | 1.01        | -6.80         | L         |
| <b>E</b>  | 0.242 | 0.266     | 0.196 | 3.94     | 0.21        | -59.08        | L         |
| <b>F</b>  | 0.239 | 0.239     | 0.231 | 4.06     | 0.50        | -21.17        | L         |
| <b>G</b>  | 0.201 | 1.313     | 1.264 | 3.45     | 1.65        | -2.09         | L         |
| <b>H</b>  | 0.202 | 0.247     | 0.232 | 2.35     | 1.02        | -8.55         | L         |
| <b>I</b>  | 0.209 | 0.038     | 0.046 | 3.55     | 0.78        | -11.32        | L         |
| <b>J</b>  | 0.211 | 0.381     | 0.397 | 3.09     | 0.00 (0.91) | -794914.44    | L         |
| <b>K</b>  | 0.182 | 1.792     | 1.278 | 2.33     | 0.00 (0.72) | -71828.52     | L         |
| <b>L</b>  | 0.262 | 0.062     | 0.066 | 3.99     | 1.43        | -1.75         | L         |
| <b>M</b>  | 0.197 | 0.960     | 0.996 | 3.45     | 4.51        | 3.03          | CT (real) |
| <b>N</b>  | 0.180 | 0.504     | 0.461 | 3.57     | 0.30        | -41.18        | L         |
| <b>O</b>  | 0.180 | 1.683     | 1.523 | 3.32     | 0.00 (0.81) | -5222.37      | L         |
| <b>P</b>  | 0.245 | 0.498     | 0.435 | 3.00     | 3.31        | 2.01          | CT (real) |
| <b>Q</b>  | 0.231 | 0.431     | 0.393 | 3.41     | 1.03        | -6.80         | L         |
| <b>R</b>  | 0.159 | 1.248     | 1.116 | 2.24     | 0.00 (0.85) | -3280.11      | L         |
| <b>S</b>  | 0.212 | 0.965     | 0.805 | 3.01     | 0.67        | -15.16        | L         |
| <b>T</b>  | 0.180 | 0.235     | 0.218 | 2.57     | 0.00 (0.78) | -76318.92     | L         |
| <b>U</b>  | 0.188 | 1.351     | 1.306 | 3.83     | 0.06        | -231.06       | L         |
| <b>V</b>  | 0.219 | 1.145     | 1.039 | 3.77     | 0.00 (0.79) | -7456.19      | L         |
| <b>W</b>  | 0.213 | 0.326     | 0.339 | 3.59     | 0.96        | -8.05         | L         |
| <b>X</b>  | 0.215 | 0.454     | 0.393 | 3.59     | 2.11        | 0.21          | CT (real) |
| <b>Y</b>  | 0.163 | 0.789     | 0.719 | 2.07     | 0.34        | -38.39        | L         |
| <b>Z</b>  | 0.207 | 0.857     | 0.729 | 2.66     | 0.54        | -20.75        | L         |
| <b>AA</b> | 0.183 | 2.214     | 2.036 | 3.35     | 0.00 (0.84) | -61544.42     | L         |
| <b>BB</b> | 0.198 | 0.743     | 0.728 | 2.64     | 0.00 (0.88) | -239905.37    | L         |
| <b>CC</b> | 0.171 | 0.798     | 0.763 | 2.53     | 0.80        | -12.70        | L         |
| <b>DD</b> | 0.182 | 2.222     | 1.941 | 3.17     | 0.49        | -23.60        | L         |
| <b>EE</b> | 0.207 | 0.338     | 0.310 | 2.49     | 0.00 (0.70) | -670202.44    | L         |
| <b>FF</b> | 0.219 | 0.680     | 0.653 | 3.91     | 1.14        | -5.14         | L         |
| <b>GG</b> | 0.203 | 0.326     | 0.309 | 4.06     | 0.55        | -18.26        | L         |
| <b>HH</b> | 0.213 | 0.402     | 0.410 | 3.14     | 0.05        | -277.41       | L         |
| <b>II</b> | 0.194 | 0.859     | 0.683 | 2.90     | 1.30        | -5.06         | L         |
| <b>JJ</b> | 0.192 | 0.234     | 0.154 | 3.20     | 1.19        | -5.35         | L         |
| <b>KK</b> | 0.234 | 0.890     | 0.897 | 4.11     | 1.00        | -6.75         | L         |
| <b>LL</b> | 0.211 | 0.057     | 0.061 | 2.95     | 1.93        | -0.80         | L         |
| <b>MM</b> | 0.180 | 0.067     | 0.068 | 2.97     | 1.82        | -1.38         | L         |
| <b>NN</b> | 0.157 | 0.440     | 0.421 | 2.05     | 0.00 (0.87) | -668470.15    | L         |

**Table S12.** The excitation energies, oscillator strengths,  $D$  and  $M_{AC}$  indexes, as well as the character of the excited states computed using the standard LC-PBE with the default parameters. For those cases where  $D$  is equal to zero, the values of the integral revealing the degree of hole and electron overlap are also shown in parenthesis (see the main text). Also given in the table are the values of the CC2 oscillator strengths ( $f^{CC2}$ ) used as reference.

| Molecule  | $f^{CC2}$ | $f$   | $E$ (eV) | $D$ (Å)     | $M_{AC}$ (eV) | Character |
|-----------|-----------|-------|----------|-------------|---------------|-----------|
| <b>A</b>  | 0.547     | 0.412 | 5.57     | 0.00 (0.89) | -91972.63     | L         |
| <b>B</b>  | 0.499     | 0.564 | 3.07     | 0.26        | -47.57        | L         |
| <b>C</b>  | 0.337     | 0.399 | 4.69     | 0.64        | -12.50        | L         |
| <b>D</b>  | 0.891     | 0.998 | 4.38     | 0.59        | -15.22        | L         |
| <b>E</b>  | 0.266     | 0.261 | 4.42     | 0.18        | -70.35        | L         |
| <b>F</b>  | 0.239     | 0.272 | 4.47     | 0.32        | -35.71        | L         |
| <b>G</b>  | 1.313     | 1.366 | 3.91     | 1.02        | -5.60         | L         |
| <b>H</b>  | 0.247     | 0.310 | 2.80     | 0.86        | -9.61         | L         |
| <b>I</b>  | 0.038     | 0.065 | 4.07     | 0.54        | -17.59        | L         |
| <b>J</b>  | 0.381     | 0.539 | 3.49     | 0.00 (0.91) | -591919.75    | L         |
| <b>K</b>  | 1.792     | 1.580 | 2.53     | 0.00 (0.76) | -94730.32     | L         |
| <b>L</b>  | 0.062     | 0.089 | 4.50     | 1.07        | -3.69         | L         |
| <b>M</b>  | 0.960     | 1.337 | 4.15     | 2.53        | 2.83          | CT (real) |
| <b>N</b>  | 0.504     | 0.557 | 4.10     | 0.18        | -72.29        | L         |
| <b>O</b>  | 1.683     | 1.550 | 3.78     | 0.00 (0.83) | -6050.83      | L         |
| <b>P</b>  | 0.498     | 0.455 | 3.49     | 3.18        | 2.99          | CT (real) |
| <b>Q</b>  | 0.431     | 0.514 | 3.78     | 0.72        | -11.31        | L         |
| <b>R</b>  | 1.248     | 1.230 | 2.62     | 0.00 (0.85) | -4409.48      | L         |
| <b>S</b>  | 0.965     | 1.002 | 3.27     | 0.49        | -21.68        | L         |
| <b>T</b>  | 0.235     | 0.357 | 3.06     | 0.00 (0.83) | -62851.61     | L         |
| <b>U</b>  | 1.351     | 1.322 | 4.28     | 0.03        | -433.48       | L         |
| <b>V</b>  | 1.145     | 1.040 | 4.06     | 0.00 (0.81) | -8024.59      | L         |
| <b>W</b>  | 0.326     | 0.497 | 4.16     | 0.37        | -29.90        | L         |
| <b>X</b>  | 0.454     | 0.505 | 4.11     | 1.41        | -1.29         | L         |
| <b>Y</b>  | 0.789     | 0.869 | 2.07     | 0.23        | -56.84        | L         |
| <b>Z</b>  | 0.857     | 0.941 | 2.85     | 0.53        | -20.06        | L         |
| <b>AA</b> | 2.214     | 2.078 | 3.87     | 0.00 (0.85) | -81723.13     | L         |
| <b>BB</b> | 0.743     | 0.911 | 3.09     | 0.00 (0.88) | -199299.01    | L         |
| <b>CC</b> | 0.798     | 0.921 | 3.01     | 0.29        | -41.57        | L         |
| <b>DD</b> | 2.222     | 2.380 | 3.85     | 0.32        | -36.84        | L         |
| <b>EE</b> | 0.338     | 0.395 | 2.99     | 0.00 (0.71) | -653187.67    | L         |
| <b>FF</b> | 0.680     | 0.654 | 4.27     | 0.74        | -10.14        | L         |
| <b>GG</b> | 0.326     | 0.406 | 4.56     | 0.24        | -49.90        | L         |
| <b>HH</b> | 0.402     | 0.520 | 3.57     | 0.06        | -255.35       | L         |
| <b>II</b> | 0.859     | 0.933 | 3.42     | 1.23        | -3.90         | L         |
| <b>JJ</b> | 0.234     | 0.404 | 3.72     | 0.39        | -27.88        | L         |
| <b>KK</b> | 0.890     | 1.008 | 4.49     | 0.59        | -15.35        | L         |
| <b>LL</b> | 0.057     | 0.113 | 3.70     | 1.69        | -0.19         | L         |
| <b>MM</b> | 0.067     | 0.149 | 3.85     | 1.51        | -0.95         | L         |
| <b>NN</b> | 0.440     | 0.506 | 1.81     | 0.00 (0.88) | -393301.15    | L         |

**Table S13.** The experimental excitation energies for the considered compounds used as reference, as well as the corresponding computed data using the PBE-based OT-RSH-PCM ( $\alpha = 0.0, \beta = 1.0$ ) and its standard version within the frameworks of LR-PCM (eq), LR-PCM (non-eq), SS-PCM (eq), and SS-PCM (non-eq). Also given as the boldface in the last rows are the related statistical metrics. All values are in eV.

| Molecule    | Exp. | LR-PCM (non-eq)                                      |             | LR-PCM (eq)                                          |             | SS-PCM (non-eq)                                      |             | SS-PCM (eq)                                          |             |
|-------------|------|------------------------------------------------------|-------------|------------------------------------------------------|-------------|------------------------------------------------------|-------------|------------------------------------------------------|-------------|
|             |      | PBE-based OT-RSH-PCM ( $\alpha = 0.0, \beta = 1.0$ ) | LC-PBE      | PBE-based OT-RSH-PCM ( $\alpha = 0.0, \beta = 1.0$ ) | LC-PBE      | PBE-based OT-RSH-PCM ( $\alpha = 0.0, \beta = 1.0$ ) | LC-PBE      | PBE-based OT-RSH-PCM ( $\alpha = 0.0, \beta = 1.0$ ) | LC-PBE      |
| <b>I</b>    | 3.99 | 4.40                                                 | 4.67        | 4.16                                                 | 4.42        | 4.56                                                 | 4.84        | 4.55                                                 | 4.82        |
| <b>II</b>   | 4.06 | 4.15                                                 | 4.47        | 4.15                                                 | 4.48        | 4.22                                                 | 4.62        | 4.22                                                 | 4.62        |
| <b>III</b>  | 4.92 | 4.42                                                 | 5.33        | 4.42                                                 | 5.33        | 4.41                                                 | 5.34        | 4.41                                                 | 5.33        |
| <b>IV</b>   | 3.78 | 3.50                                                 | 4.55        | 3.45                                                 | 4.46        | 3.48                                                 | 4.57        | 3.41                                                 | 4.52        |
| <b>V</b>    | 3.78 | 3.47                                                 | 4.52        | 3.41                                                 | 4.42        | 3.44                                                 | 4.53        | 3.37                                                 | 4.48        |
| <b>VI</b>   | 3.36 | 3.24                                                 | 4.14        | 3.17                                                 | 4.01        | 3.25                                                 | 4.17        | 3.21                                                 | 4.11        |
| <b>VII</b>  | 4.35 | 4.22                                                 | 5.10        | 4.07                                                 | 4.94        | 4.24                                                 | 5.14        | 4.16                                                 | 5.06        |
| <b>VIII</b> | 3.23 | 3.14                                                 | 4.06        | 2.95                                                 | 3.85        | 3.20                                                 | 4.07        | 3.14                                                 | 4.13        |
| <b>IX</b>   | 4.37 | 3.89                                                 | 4.63        | 3.64                                                 | 4.39        | 3.98                                                 | 4.74        | 3.67                                                 | 4.69        |
| <b>X</b>    | 4.31 | 3.86                                                 | 4.67        | 3.65                                                 | 4.47        | 3.92                                                 | 4.78        | 3.59                                                 | 4.74        |
| <b>XI</b>   | 3.96 | 4.01                                                 | 4.44        | 3.81                                                 | 4.20        | 4.10                                                 | 4.56        | 4.09                                                 | 4.53        |
| <b>XII</b>  | 4.85 | 5.39                                                 | 5.54        | 5.30                                                 | 5.42        | 5.42                                                 | 5.59        | 5.41                                                 | 5.58        |
| <b>XIII</b> | 4.53 | 4.72                                                 | 5.33        | 4.72                                                 | 5.33        | 4.72                                                 | 5.36        | 4.72                                                 | 5.36        |
| <b>XIV</b>  | 4.46 | 4.62                                                 | 5.25        | 4.62                                                 | 5.25        | 4.63                                                 | 5.28        | 4.63                                                 | 5.28        |
| <b>MSD</b>  |      | <b>-0.07</b>                                         | <b>0.62</b> | <b>-0.18</b>                                         | <b>0.50</b> | <b>-0.03</b>                                         | <b>0.69</b> | <b>-0.10</b>                                         | <b>0.66</b> |
| <b>MAD</b>  |      | <b>0.27</b>                                          | <b>0.62</b> | <b>0.33</b>                                          | <b>0.50</b> | <b>0.28</b>                                          | <b>0.69</b> | <b>0.35</b>                                          | <b>0.66</b> |
| <b>RMSD</b> |      | <b>0.32</b>                                          | <b>0.65</b> | <b>0.38</b>                                          | <b>0.55</b> | <b>0.33</b>                                          | <b>0.71</b> | <b>0.41</b>                                          | <b>0.68</b> |

**Table S14.** The numerical results of the oscillator strengths computed using the standard LC functionals for the molecules with the “very high” confidence level on their experimental oscillator strengths.

| Molecule    | Standard LC functionals |        |         |
|-------------|-------------------------|--------|---------|
|             | LC-BLYP                 | LC-PBE | LC-TPSS |
| <b>I</b>    | 1.060                   | 1.065  | 1.070   |
| <b>II</b>   | 0.618                   | 0.621  | 0.626   |
| <b>III</b>  | 0.324                   | 0.327  | 0.323   |
| <b>IV</b>   | 0.162                   | 0.162  | 0.000   |
| <b>V</b>    | 0.148                   | 0.149  | 0.149   |
| <b>VI</b>   | 0.185                   | 0.184  | 0.185   |
| <b>VII</b>  | 0.477                   | 0.492  | 0.485   |
| <b>VIII</b> | 0.620                   | 0.632  | 0.632   |
| <b>IX</b>   | 0.890                   | 0.903  | 0.902   |
| <b>X</b>    | 0.834                   | 0.848  | 0.848   |
| <b>XI</b>   | 0.360                   | 0.366  | 0.367   |
| <b>XII</b>  | 0.141                   | 0.139  | 0.141   |
| <b>XIII</b> | 0.117                   | 0.116  | 0.117   |
| <b>XIV</b>  | 0.164                   | 0.164  | 0.165   |

**Table S15.** The numerical results of the oscillator strengths computed using the RSH and SX functionals for the molecules with the “very high” confidence level on their experimental oscillator strengths.

| Molecule    | RSHs and SX |       |                |         |
|-------------|-------------|-------|----------------|---------|
|             | CAM-B3LYP   | M11   | $\omega$ B97XD | MN12-SX |
| <b>I</b>    | 1.043       | 1.024 | 1.042          | 0.922   |
| <b>II</b>   | 0.562       | 0.565 | 0.564          | 0.530   |
| <b>III</b>  | 0.324       | 0.340 | 0.327          | 0.289   |
| <b>IV</b>   | 0.137       | 0.155 | 0.137          | 0.112   |
| <b>V</b>    | 0.117       | 0.137 | 0.117          | 0.088   |
| <b>VI</b>   | 0.153       | 0.170 | 0.153          | 0.123   |
| <b>VII</b>  | 0.477       | 0.495 | 0.480          | 0.411   |
| <b>VIII</b> | 0.574       | 0.602 | 0.577          | 0.517   |
| <b>IX</b>   | 0.899       | 0.899 | 0.906          | 0.841   |
| <b>X</b>    | 0.845       | 0.845 | 0.855          | 0.794   |
| <b>XI</b>   | 0.338       | 0.332 | 0.345          | 0.275   |
| <b>XII</b>  | 0.133       | 0.136 | 0.131          | 0.137   |
| <b>XIII</b> | 0.105       | 0.112 | 0.104          | 0.086   |
| <b>XIV</b>  | 0.154       | 0.163 | 0.153          | 0.144   |



**Table S16.** The numerical results of the oscillator strengths computed using the hybrid functionals for the molecules with the “very high” confidence level on their experimental oscillator strengths.

| Molecule    | Hybrids |        |       |
|-------------|---------|--------|-------|
|             | B3LYP   | M06-2X | PBE0  |
| <b>I</b>    | 1.025   | 1.030  | 1.039 |
| <b>II</b>   | 0.517   | 0.555  | 0.533 |
| <b>III</b>  | 0.290   | 0.336  | 0.302 |
| <b>IV</b>   | 0.100   | 0.140  | 0.110 |
| <b>V</b>    | 0.081   | 0.122  | 0.090 |
| <b>VI</b>   | 0.115   | 0.156  | 0.125 |
| <b>VII</b>  | 0.448   | 0.487  | 0.462 |
| <b>VIII</b> | 0.517   | 0.586  | 0.536 |
| <b>IX</b>   | 0.864   | 0.896  | 0.883 |
| <b>X</b>    | 0.816   | 0.843  | 0.835 |
| <b>XI</b>   | 0.312   | 0.333  | 0.324 |
| <b>XII</b>  | 0.123   | 0.136  | 0.127 |
| <b>XIII</b> | 0.090   | 0.112  | 0.094 |
| <b>XIV</b>  | 0.138   | 0.159  | 0.144 |

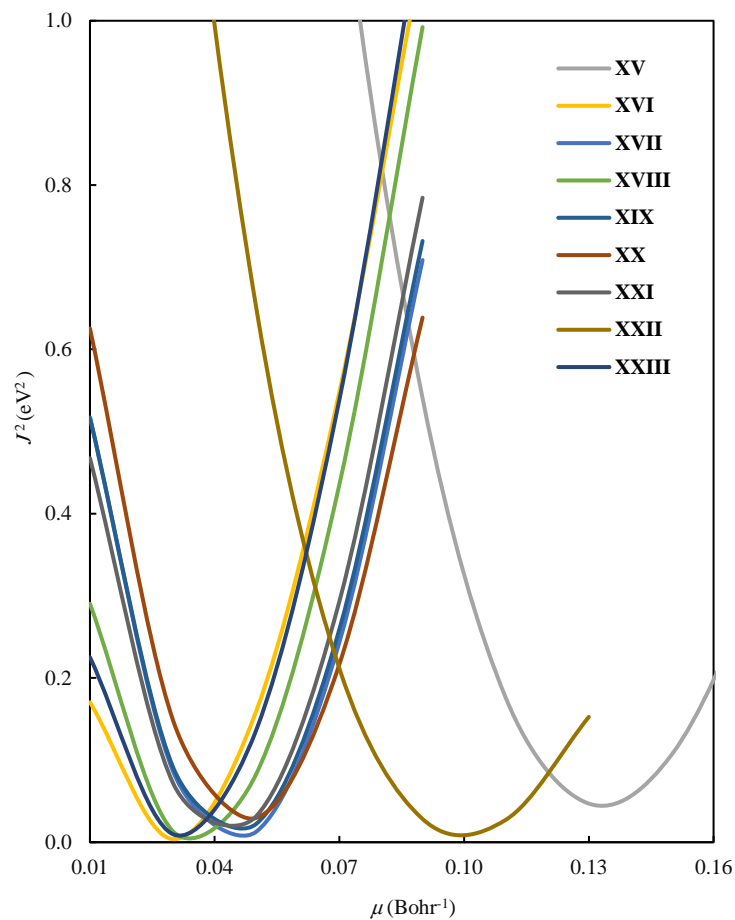

**Figure S1.** Plot of the target function  $J^2$  as a function of the range-separation parameter  $\mu$  for the molecules with the “high” confidence level on their experimental oscillator strengths using the combination  $\alpha = 0.0, \beta = 1.0$ .
